# Supplementary material for: Purification of nitrogen-doped graphene quantum dots via the liquid–liquid extraction system of tetrahydrofuran–(NH4)2SO4–water and its application to sensitive iron(iii) ions determination
Source: Royal Society of Chemistry journal article supplement (doi:10.1039/c7ay01841j), 2017-01-01
Supplement: c7ay01841j1.pdf [file c7ay01841j1.pdf]

## Electronic Supplementary Information

### Purification of Nitrogen-doped graphene quantum dots via liquid-liquid extraction system of Tetrahydrofuran-(NH<sub>4</sub>)<sub>2</sub>SO<sub>4</sub>-Water and its application to sensitive iron (III) ions determination

WenJun Zhang,<sup>\*a</sup> Shaokang Tang<sup>a</sup>, Shaopei Zhang<sup>a</sup> and Yi Chen<sup>a</sup>

School of Chemical Engineering, Hebei University of Technology, Tianjin  
300130,  
China

**\*Correspondence information: Wenjun Zhang, Institute of Chemical  
Technology,  
Hebei University of Technology, Tianjin, 300130, China, E-mail:  
wjzhang@hebut.edu.cn. Fax: +022 6020 4294.**

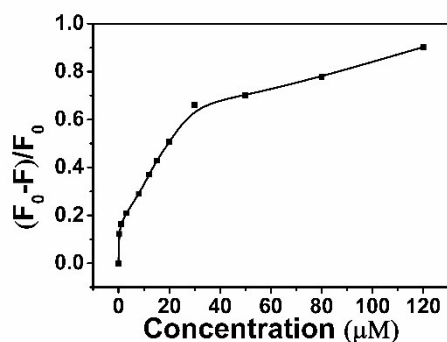

**Figure S1.** plot of  $(F_0-F)/F_0$  versus concentration of Fe<sup>3+</sup> (0.20-120 μ M). F<sub>0</sub> and F are the FL intensities at 435 nm in the absence and presence of Fe<sup>3+</sup> ions, respectively.
